# Supplementary material for: West Nile Virus Lineage 2 Vector Competence of Indigenous Culex and Aedes Mosquitoes from Germany at Temperate Climate Conditions
Source: PubMed Central journal article supplement (PMC7291008; doi:10.3390/v12050561), 2020-05-19
Supplement: viruses-12-00561-s001.pdf [file viruses-12-00561-s001.pdf]

## Supplementary Materials

**Table S1.** Overview on explanatory variables included in the final generalized binomial regression models (glm) for the investigated rates at 25 °C.

| Explanatory variables                             | Response variables |               |                |                    |                   |                         |
|---------------------------------------------------|--------------------|---------------|----------------|--------------------|-------------------|-------------------------|
|                                                   | Feeding rate       | Survival rate | Infection rate | Dissemination rate | Transmission rate | Transmission efficiency |
| Species                                           | x                  | x             | x              | x                  | x                 | x                       |
| Days post infection                               | /                  | x             | x              | x                  | x                 | /                       |
| Interaction term:<br>Species: days post infection | /                  | /             | x              | /                  | x                 | /                       |

**Table S2.** Overview on explanatory variables included in the final generalized binomial regression models (glm) for *Culex pipiens* biotype *pipiens* (G) at three different temperature regimes for the investigated rates.

| Explanatory variables                                 | Response variables |                    |                   |                         |
|-------------------------------------------------------|--------------------|--------------------|-------------------|-------------------------|
|                                                       | Infection rate     | Dissemination rate | Transmission rate | Transmission efficiency |
| Temperature                                           | x                  | x                  | x                 | x                       |
| Days post infection                                   | /                  | /                  | /                 | /                       |
| Interaction term:<br>Temperature: days post infection | /                  | /                  | /                 | /                       |

**Table S3.** *p*-values of the fixed effects in the least-square means analysis when comparing the rates between all species at 25 °C in the final generalized binomial regression models specified in Supplementary Materials Table S1. *p*-value adjustment was performed using the Tukey method.

| Fixed effects: |               |                           |                          |                          |                         |                         |                            |
|----------------|---------------|---------------------------|--------------------------|--------------------------|-------------------------|-------------------------|----------------------------|
|                |               | Feeding<br>rate           | Survival<br>rate         | Infection<br>rate*       | Dissemination<br>rate   | Transmission<br>rate*   | Transmission<br>efficiency |
|                | contrast      | <i>p</i> -value           | <i>p</i> -value          | <i>p</i> -value          | <i>p</i> -value         | <i>p</i> -value         | <i>p</i> -value            |
| Species        | AA_J - CPM_N  | 9.01 × 10 <sup>-1</sup>   | 7.88 × 10 <sup>-3*</sup> | 4.66 × 10 <sup>-3*</sup> | 6.50 × 10 <sup>-1</sup> | 1.00                    | 9.84 × 10 <sup>-1</sup>    |
|                | AA_J - CPM_W  | 9.85 × 10 <sup>-1</sup>   | 4.05 × 10 <sup>-4*</sup> | 1.00                     | 9.98 × 10 <sup>-1</sup> | 1.00                    | 8.02 × 10 <sup>-1</sup>    |
|                | AA_J - CPP_G  | 5.12 × 10 <sup>-10*</sup> | 2.39 × 10 <sup>-8*</sup> | 3.09 × 10 <sup>-7*</sup> | 9.67 × 10 <sup>-1</sup> | 1.00                    | 3.04 × 10 <sup>-4*</sup>   |
|                | AA_J - CPP_S  | 3.22 × 10 <sup>-3*</sup>  | 1.57 × 10 <sup>-6*</sup> | 1.00                     | 8.74 × 10 <sup>-1</sup> | 1.00                    | 4.83 × 10 <sup>-5*</sup>   |
|                | CPM_N - CPM_W | 1.00                      | 8.79 × 10 <sup>-2</sup>  | 1.00                     | 8.69 × 10 <sup>-1</sup> | 1.00                    | 9.54 × 10 <sup>-1</sup>    |
|                | CPM_N - CPP_G | 7.29 × 10 <sup>-7*</sup>  | 2.36 × 10 <sup>-4*</sup> | 4.62 × 10 <sup>-2*</sup> | 6.57 × 10 <sup>-1</sup> | 1.24 × 10 <sup>-1</sup> | 4.39 × 10 <sup>-4*</sup>   |
|                | CPM_N - CPP_S | 7.97 × 10 <sup>-4*</sup>  | 3.90 × 10 <sup>-3*</sup> | 1.00                     | 5.14 × 10 <sup>-2</sup> | 8.14 × 10 <sup>-1</sup> | 5.98 × 10 <sup>-5*</sup>   |
|                | CPM_W - CPP_G | 1.91 × 10 <sup>-2*</sup>  | 8.20 × 10 <sup>-1</sup>  | 1.00                     | 9.99 × 10 <sup>-1</sup> | 1.00                    | 1.45 × 10 <sup>-1</sup>    |
|                | CPM_W - CPP_S | 6.77 × 10 <sup>-3*</sup>  | 9.75 × 10 <sup>-1</sup>  | 1.00                     | 7.23 × 10 <sup>-1</sup> | 1.00                    | 5.35 × 10 <sup>-2</sup>    |
|                | CPP_G - CPP_S | 3.67 × 10 <sup>-9*</sup>  | 9.88 × 10 <sup>-1</sup>  | 1.00                     | 2.90 × 10 <sup>-1</sup> | 3.83 × 10 <sup>-1</sup> | 9.53 × 10 <sup>-1</sup>    |
| Days post      |               |                           |                          |                          |                         |                         |                            |
| infection      | 14/15 – 20/21 | NA                        | 9.80 × 10 <sup>-2</sup>  | 9.90 × 10 <sup>-1</sup>  | 2.13 × 10 <sup>-1</sup> | 9.97 × 10 <sup>-1</sup> | NA                         |

\**p* < 0.05. \*Results for fixed effects may be misleading due to involvement in interactions (Supplementary Materials Table S4). CPP\_G: *Culex pipiens* biotype *pipiens* from “Groß Kreuz”, Brandenburg, Germany. CPP\_S: *Cx. pipiens* biotype *pipiens* from “Schöneiche” and “Rehfelde”, Brandenburg, Germany. CPM\_W: *Cx. pipiens* biotype *molestus* from “Wendland”, Lower Saxony, Germany. CPM\_N: *Cx. pipiens* biotype *molestus* from Novi Sad, Republic of Serbia. AA\_J: *Aedes albopictus* from Jena, Thuringia, Germany.

**Table S4.** *p*-values of the interaction term in the least-square means analysis for the infection and transmission rate at 25 °C.

| Interactions:  |                           |                          |                      |
|----------------|---------------------------|--------------------------|----------------------|
|                |                           | Infection<br>rate        | Transmission<br>rate |
| Species:days   |                           |                          |                      |
| post infection | contrast                  | <i>p</i> -value          | <i>p</i> -value      |
|                | AA_J,14/15 - CPM_N,14/15  | 5.35 × 10 <sup>-4*</sup> | 1.00                 |
|                | AA_J,14/15 - CPM_W,14/15  | 1.00                     | 1.00                 |
|                | AA_J,14/15 - CPP_G,14/15  | 2.22 × 10 <sup>-3*</sup> | 1.00                 |
|                | AA_J,14/15 - CPP_S,14/15  | 1.00                     | 1.00                 |
|                | AA_J,14/15 - AA_J,20/21   | 9.79 × 10 <sup>-1</sup>  | 1.00                 |
|                | AA_J,14/15 - CPM_N,20/21  | 7.62 × 10 <sup>-1</sup>  | 1.00                 |
|                | AA_J,14/15 - CPM_W,20/21  | 1.00                     | 1.00                 |
|                | AA_J,14/15 - CPP_G,20/21  | 4.66 × 10 <sup>-5*</sup> | 1.00                 |
|                | AA_J,14/15 - CPP_S,20/21  | 6.63 × 10 <sup>-4*</sup> | 1.00                 |
|                | CPM_N,14/15 - CPM_W,14/15 | 1.00                     | 1.00                 |

|                           |                          |                         |
|---------------------------|--------------------------|-------------------------|
| CPM_N,14/15 - CPP_G,14/15 | 1.00                     | 2.48 × 10 <sup>-1</sup> |
| CPM_N,14/15 - CPP_S,14/15 | 1.00                     | 8.33 × 10 <sup>-1</sup> |
| CPM_N,14/15 - AA_J,20/21  | 4.85 × 10 <sup>-2*</sup> | 1.00                    |
| CPM_N,14/15 - CPM_N,20/21 | 3.96 × 10 <sup>-2*</sup> | 9.95 × 10 <sup>-1</sup> |
| CPM_N,14/15 - CPM_W,20/21 | 9.48 × 10 <sup>-2</sup>  | 1.00                    |
| CPM_N,14/15 - CPP_G,20/21 | 9.92 × 10 <sup>-1</sup>  | 1.77 × 10 <sup>-1</sup> |
| CPM_N,14/15 - CPP_S,20/21 | 6.12 × 10 <sup>-1</sup>  | 7.60 × 10 <sup>-1</sup> |
| CPM_W,14/15 - CPP_G,14/15 | 1.00                     | 7.52 × 10 <sup>-1</sup> |
| CPM_W,14/15 - CPP_S,14/15 | 1.00                     | 9.98 × 10 <sup>-1</sup> |
| CPM_W,14/15 - AA_J,20/21  | 1.00                     | 1.00                    |
| CPM_W,14/15 - CPM_N,20/21 | 1.00                     | 1.00                    |
| CPM_W,14/15 - CPM_W,20/21 | 1.00                     | 1.00                    |
| CPM_W,14/15 - CPP_G,20/21 | 1.00                     | 7.84 × 10 <sup>-1</sup> |
| CPM_W,14/15 - CPP_S,20/21 | 1.00                     | 9.95 × 10 <sup>-1</sup> |
| CPP_G,14/15 - CPP_S,14/15 | 1.00                     | 9.27 × 10 <sup>-1</sup> |
| CPP_G,14/15 - AA_J,20/21  | 9.84 × 10 <sup>-2</sup>  | 1.00                    |
| CPP_G,14/15 - CPM_N,20/21 | 1.08 × 10 <sup>-1</sup>  | 9.86 × 10 <sup>-1</sup> |
| CPP_G,14/15 - CPM_W,20/21 | 1.15 × 10 <sup>-1</sup>  | 1.00                    |
| CPP_G,14/15 - CPP_G,20/21 | 9.97 × 10 <sup>-1</sup>  | 1.00                    |
| CPP_G,14/15 - CPP_S,20/21 | 6.68 × 10 <sup>-1</sup>  | 9.71 × 10 <sup>-1</sup> |
| CPP_S,14/15 - AA_J,20/21  | 1.00                     | 1.00                    |
| CPP_S,14/15 - CPM_N,20/21 | 1.00                     | 1.00                    |
| CPP_S,14/15 - CPM_W,20/21 | 1.00                     | 1.00                    |
| CPP_S,14/15 - CPP_G,20/21 | 1.00                     | 9.43 × 10 <sup>-1</sup> |
| CPP_S,14/15 - CPP_S,20/21 | 1.00                     | 1.00                    |
| AA_J,20/21 - CPM_N,20/21  | 1.00                     | 1.00                    |
| AA_J,20/21 - CPM_W,20/21  | 9.86 × 10 <sup>-1</sup>  | 1.00                    |
| AA_J,20/21 - CPP_G,20/21  | 5.81 × 10 <sup>-3*</sup> | 1.00                    |
| AA_J,20/21 - CPP_S,20/21  | 1.06 × 10 <sup>-2*</sup> | 1.00                    |
| CPM_N,20/21 - CPM_W,20/21 | 9.27 × 10 <sup>-1</sup>  | 1.00                    |
| CPM_N,20/21 - CPP_G,20/21 | 3.94 × 10 <sup>-3*</sup> | 9.95 × 10 <sup>-1</sup> |
| CPM_N,20/21 - CPP_S,20/21 | 1.46 × 10 <sup>-2*</sup> | 1.00                    |
| CPM_W,20/21 - CPP_G,20/21 | 2.47 × 10 <sup>-2*</sup> | 1.00                    |
| CPM_W,20/21 - CPP_S,20/21 | 8.07 × 10 <sup>-3*</sup> | 1.00                    |
| CPP_G,20/21 - CPP_S,20/21 | 9.32 × 10 <sup>-1</sup>  | 9.84 × 10 <sup>-1</sup> |

\* $p < 0.05$ . CPP\_G: *Culex pipiens* biotype *pipiens* from "Groß Kreuz", Brandenburg, Germany. CPP\_S: *Cx. pipiens* biotype *pipiens* from "Schöneiche" and "Rehfelde" Brandenburg, Germany. CPM\_W: *Cx. pipiens* biotype *molestus* from "Wendland" Lower Saxony, Germany. CPM\_N: *Cx. pipiens* biotype *molestus* from "Novi Sad", Republic of Serbia. AA\_J: *Aedes albopictus* from Jena, Germany.

**Table S5.** *p*-values of the fixed effect temperature in the least-square means analysis when comparing the rates at temperatures of 18 °C, 25 °C, and 28 °C in the final generalized binomial regression models specified in Supplemental Table 2. *p*-value adjustment was performed using the Tukey method.

| <b>Fixed effect:</b>    |                 |                          |                         |                          |                          |                          |
|-------------------------|-----------------|--------------------------|-------------------------|--------------------------|--------------------------|--------------------------|
|                         |                 | <b>Survival</b>          | <b>Infection</b>        | <b>Dissemination</b>     | <b>Transmission</b>      | <b>Transmission</b>      |
|                         |                 | <b>rate</b>              | <b>rate</b>             | <b>rate</b>              | <b>rate</b>              | <b>efficiency</b>        |
|                         | <b>contrast</b> | <b><i>p</i>-value</b>    | <b><i>p</i>-value</b>   | <b><i>p</i>-value</b>    | <b><i>p</i>-value</b>    | <b><i>p</i>-value</b>    |
| <b>Temperature (°C)</b> | 18 - 25         | 6.46 × 10 <sup>-1</sup>  | 4.04 × 10 <sup>-1</sup> | 6.95 × 10 <sup>-5*</sup> | 3.66 × 10 <sup>-2*</sup> | 8.14 × 10 <sup>-4*</sup> |
|                         | 18 - 28         | 7.74 × 10 <sup>-3*</sup> | 3.37 × 10 <sup>-1</sup> | 5.01 × 10 <sup>-3*</sup> | 2.87 × 10 <sup>-1</sup>  | 1.02 × 10 <sup>-2*</sup> |
|                         | 25 - 28         | 3.78 × 10 <sup>-2*</sup> | 9.16 × 10 <sup>-1</sup> | 6.01 × 10 <sup>-1</sup>  | 6.87 × 10 <sup>-1</sup>  | 9.40 × 10 <sup>-1</sup>  |

\**p* < 0.05.
